# Supplementary material for: Altered gut microbiota and its association with inflammation in patients with chronic thromboembolic pulmonary hypertension: a single-center observational study in Japan
Source: PubMed Central journal article supplement (PMC8994357; doi:10.1186/s12890-022-01932-0), 2022-04-08
Supplement: 12890_2022_1932_MOESM1_ESM.pdf [file 12890_2022_1932_MOESM1_ESM.pdf]

## Additional file 1. Dietary intake comparison analysis between patients with CTEPH and control participants

| Nutrients                                         | Patients with CTEPH |         |         |         | Control participants |         |         |         | p-value | FDR  |
|---------------------------------------------------|---------------------|---------|---------|---------|----------------------|---------|---------|---------|---------|------|
|                                                   | Min.                | Med.    | Max.    | Ave.    | Min.                 | Med.    | Max.    | Ave.    |         |      |
| Energy (kcal)                                     | 570.35              | 1447.38 | 2055.65 | 1372.42 | 1061.47              | 1710.72 | 2474.82 | 1754.83 | 0.07    | 0.71 |
| Energy from total protein (%energy)               | 12.95               | 16.01   | 21.27   | 16.53   | 12.21                | 17.61   | 23.73   | 17.30   | 0.74    | 0.91 |
| Energy from animal protein (%energy)              | 6.71                | 8.62    | 13.26   | 9.67    | 5.84                 | 10.98   | 16.84   | 10.64   | 0.59    | 0.87 |
| Energy from vegetable protein (%energy)           | 5.08                | 6.53    | 9.15    | 6.86    | 5.28                 | 6.60    | 8.49    | 6.65    | 0.91    | 0.97 |
| Energy from total fat (%energy)                   | 19.97               | 26.03   | 40.48   | 27.59   | 16.96                | 30.43   | 38.31   | 29.21   | 0.47    | 0.87 |
| Energy from animal fat (%energy)                  | 9.05                | 13.50   | 20.29   | 14.36   | 8.73                 | 14.62   | 22.19   | 14.99   | 0.65    | 0.88 |
| Energy from vegetable fat (%energy)               | 8.54                | 11.84   | 20.62   | 13.23   | 4.21                 | 13.49   | 20.19   | 14.22   | 0.37    | 0.87 |
| Energy from saturated fat (%energy)               | 4.60                | 6.52    | 11.46   | 7.48    | 4.95                 | 8.16    | 10.53   | 7.83    | 0.74    | 0.91 |
| Monounsaturated fat (%energy)                     | 6.43                | 9.38    | 14.92   | 9.76    | 5.80                 | 9.90    | 14.00   | 10.16   | 0.59    | 0.87 |
| Polyunsaturated fat (%energy)                     | 4.03                | 6.40    | 10.69   | 6.48    | 3.10                 | 7.70    | 10.03   | 7.22    | 0.33    | 0.87 |
| Energy from carbohydrate (%energy)                | 39.97               | 58.69   | 65.72   | 55.88   | 39.94                | 51.84   | 69.66   | 53.49   | 0.4     | 0.87 |
| Alcohol (%energy)                                 | 0.00                | 0.00    | 11.38   | 1.38    | 0.00                 | 0.52    | 9.27    | 2.02    | 0.06    | 0.79 |
| Ash content per 1000 kcal (g)                     | 9.24                | 10.63   | 17.25   | 11.29   | 6.99                 | 11.55   | 15.51   | 11.49   | 0.56    | 0.87 |
| Sodium per 1000 kcal (mg)                         | 2131.70             | 2497.60 | 4065.01 | 2635.92 | 1558.06              | 2618.23 | 3307.45 | 2486.93 | 0.98    | 0.98 |
| Potassium per 1000 kcal (mg)                      | 931.71              | 1516.21 | 2272.92 | 1501.71 | 858.40               | 1639.42 | 2713.94 | 1711.93 | 0.23    | 0.87 |
| Calcium per 1000 kcal (mg)                        | 175.98              | 326.35  | 537.93  | 330.52  | 165.99               | 362.78  | 673.48  | 384.00  | 0.31    | 0.87 |
| Magnesium per 1000 kcal (mg)                      | 105.64              | 141.09  | 216.35  | 146.45  | 96.41                | 163.88  | 256.51  | 163.41  | 0.23    | 0.87 |
| Phosphorus per 1000 kcal (mg)                     | 493.48              | 604.14  | 820.64  | 629.66  | 414.63               | 666.98  | 991.91  | 675.89  | 0.53    | 0.87 |
| Iron per 1000 kcal (mg)                           | 2.39                | 4.73    | 8.18    | 4.80    | 2.88                 | 5.35    | 8.60    | 5.21    | 0.27    | 0.87 |
| Zinc per 1000 kcal (mg)                           | 3.51                | 4.62    | 5.48    | 4.63    | 3.93                 | 4.77    | 6.78    | 4.91    | 0.45    | 0.87 |
| Copper per 1000 kcal (mg)                         | 0.53                | 0.62    | 0.93    | 0.66    | 0.55                 | 0.65    | 0.92    | 0.67    | 0.56    | 0.87 |
| Manganese per 1000 kcal (mg)                      | 1.36                | 1.87    | 5.72    | 2.33    | 1.25                 | 1.80    | 2.94    | 1.95    | 0.68    | 0.9  |
| Retinol per 1000 kcal (µg)                        | 114.07              | 165.35  | 452.96  | 207.57  | 65.17                | 255.65  | 529.70  | 273.81  | 0.29    | 0.87 |
| β-Carotene equivalents per 1000 kcal (µg)         | 621.87              | 1766.34 | 3359.01 | 1874.32 | 561.84               | 2895.44 | 5858.81 | 3119.03 | 0.06    | 0.79 |
| Retinol equivalents per 1000 kcal (µg)            | 183.61              | 376.96  | 531.35  | 365.96  | 197.62               | 524.63  | 952.77  | 535.78  | 0.03    | 0.79 |
| Vitamine D per 1000 kcal (µg)                     | 4.30                | 8.12    | 23.67   | 10.01   | 2.23                 | 10.14   | 25.59   | 10.54   | 0.88    | 0.97 |
| α-Tocopherol per 1000 kcal (mg)                   | 2.26                | 3.87    | 6.79    | 4.13    | 1.78                 | 5.19    | 8.06    | 4.88    | 0.09    | 0.84 |
| Vitamine K per 1000 kcal (µg)                     | 28.99               | 166.11  | 288.09  | 162.10  | 64.78                | 210.39  | 406.95  | 220.49  | 0.2     | 0.87 |
| Vitamine B1 per 1000 kcal (mg)                    | 0.36                | 0.46    | 0.62    | 0.47    | 0.33                 | 0.51    | 0.78    | 0.50    | 0.65    | 0.88 |
| Vitamine B2 per 1000 kcal (mg)                    | 0.61                | 0.84    | 1.32    | 0.84    | 0.55                 | 0.80    | 1.34    | 0.85    | 0.91    | 0.97 |
| Niacin per 1000 kcal (mg)                         | 6.07                | 8.81    | 17.64   | 10.04   | 7.18                 | 10.38   | 16.32   | 11.08   | 0.23    | 0.87 |
| Vitamine B6 per 1000 kcal (mg)                    | 0.44                | 0.73    | 1.40    | 0.76    | 0.49                 | 0.78    | 1.22    | 0.82    | 0.29    | 0.87 |
| Vitamine B12 per 1000 kcal (µg)                   | 2.17                | 4.99    | 11.91   | 5.88    | 2.27                 | 5.77    | 13.95   | 6.42    | 0.84    | 0.96 |
| Folic acid per 1000 kcal (µg)                     | 110.55              | 206.09  | 518.88  | 225.58  | 103.16               | 220.82  | 455.16  | 241.92  | 0.35    | 0.87 |
| Pantothenic acid per 1000 kcal (mg)               | 3.00                | 3.74    | 4.53    | 3.82    | 2.84                 | 3.79    | 5.90    | 4.00    | 0.59    | 0.87 |
| Vitamine C per 1000 kcal (mg)                     | 48.59               | 78.92   | 193.72  | 87.46   | 19.27                | 75.96   | 150.55  | 79.15   | 0.81    | 0.95 |
| Saturated fatty acids per 1000 kcal (g)           | 5.11                | 7.24    | 12.74   | 8.31    | 5.50                 | 9.07    | 11.70   | 8.70    | 0.74    | 0.91 |
| Monounsaturated fatty acids per 1000 kcal (g)     | 7.15                | 10.42   | 16.58   | 10.85   | 6.44                 | 11.00   | 15.56   | 11.29   | 0.59    | 0.87 |
| Polyunsaturated fatty acids per 1000 kcal (g)     | 4.48                | 7.11    | 11.87   | 7.20    | 3.45                 | 8.55    | 11.14   | 8.02    | 0.33    | 0.87 |
| Cholesterol per 1000 kcal (mg)                    | 121.84              | 231.49  | 308.36  | 232.73  | 118.76               | 227.33  | 419.97  | 241.65  | 0.98    | 0.98 |
| Water soluble dietary fiber per 1000 kcal (g)     | 0.94                | 1.88    | 3.02    | 1.84    | 0.57                 | 1.94    | 3.36    | 1.99    | 0.56    | 0.87 |
| Insoluble dietary fiber per 1000 kcal (g)         | 3.48                | 5.34    | 9.21    | 5.35    | 2.84                 | 5.57    | 8.80    | 5.66    | 0.47    | 0.87 |
| Total dietary fiber per 1000 kcal (g)             | 4.58                | 7.33    | 12.23   | 7.37    | 3.72                 | 8.07    | 12.41   | 7.94    | 0.53    | 0.87 |
| Salt equivalent per 1000 kcal (g)                 | 5.39                | 6.33    | 10.14   | 6.65    | 3.92                 | 6.61    | 8.33    | 6.27    | 0.98    | 0.98 |
| Sugar per 1000 kcal (g)                           | 0.00                | 4.93    | 9.94    | 4.92    | 0.31                 | 5.51    | 15.80   | 6.17    | 0.47    | 0.87 |
| Alcohol per 1000 kcal (g)                         | 0.00                | 0.00    | 16.25   | 1.98    | 0.00                 | 0.74    | 13.24   | 2.89    | 0.06    | 0.79 |
| Daidzein per 1000 kcal (mg)                       | 1.73                | 6.47    | 17.70   | 8.32    | 2.50                 | 7.77    | 22.14   | 8.75    | 0.62    | 0.88 |
| Genistein per 1000 kcal (mg)                      | 2.98                | 11.09   | 30.52   | 14.16   | 4.22                 | 13.25   | 37.95   | 14.89   | 0.59    | 0.87 |
| ω:3 polyunsaturated fatty acids per 1000 kcal (g) | 0.59                | 1.47    | 2.61    | 1.65    | 0.46                 | 1.82    | 2.49    | 1.71    | 0.81    | 0.95 |
| ω:6 polyunsaturated fatty acids per 1000 kcal (g) | 3.84                | 5.51    | 9.20    | 5.51    | 2.97                 | 6.65    | 9.31    | 6.28    | 0.35    | 0.87 |

CTEPH: chronic thromboembolic pulmonary hypertension; FDR: false discovery rate.
