# Supplementary material for: Altered gut microbiota and its association with inflammation in patients with chronic thromboembolic pulmonary hypertension: a single-center observational study in Japan
Source: PubMed Central journal article supplement (PMC8994357; doi:10.1186/s12890-022-01932-0), 2022-04-08
Supplement: 12890_2022_1932_MOESM2_ESM.pdf [file 12890_2022_1932_MOESM2_ESM.pdf]

## Additional file2. Univariate analysis for overall microbiome community variation using the envfit function

| Nutrients                                         | p-value | FDR  |
|---------------------------------------------------|---------|------|
| Energy (kcal)                                     | 0.60    | 0.67 |
| Energy from total protein (%energy)               | 0.10    | 0.24 |
| Energy from animal protein (%energy)              | 0.13    | 0.24 |
| Energy from vegetable protein (%energy)           | 0.23    | 0.33 |
| Energy from total fat (%energy)                   | 0.07    | 0.24 |
| Energy from animal fat (%energy)                  | 0.08    | 0.24 |
| Energy from vegetable fat (%energy)               | 0.17    | 0.28 |
| Energy from saturated fat (%energy)               | 0.13    | 0.24 |
| Monounsaturated fat (%energy)                     | 0.21    | 0.32 |
| Polyunsaturated fat (%energy)                     | 0.04    | 0.24 |
| Energy from carbohydrate (%energy)                | 0.04    | 0.24 |
| Alcohol (%energy)                                 | 0.57    | 0.67 |
| Ash content per 1000 kcal (g)                     | 0.60    | 0.67 |
| Sodium per 1000 kcal (mg)                         | 0.83    | 0.85 |
| Potassium per 1000 kcal (mg)                      | 0.08    | 0.24 |
| Calcium per 1000 kcal (mg)                        | 0.12    | 0.24 |
| Magnesium per 1000 kcal (mg)                      | 0.06    | 0.24 |
| Phosphorus per 1000 kcal (mg)                     | 0.12    | 0.24 |
| Iron per 1000 kcal (mg)                           | 0.08    | 0.24 |
| Zinc per 1000 kcal (mg)                           | 0.14    | 0.25 |
| Copper per 1000 kcal (mg)                         | 0.09    | 0.24 |
| Manganese per 1000 kcal (mg)                      | 0.67    | 0.71 |
| Retinol per 1000 kcal (µg)                        | 0.17    | 0.28 |
| β-Carotene equivalents per 1000 kcal (µg)         | 0.12    | 0.24 |
| Retinol equivalents per 1000 kcal (µg)            | 0.05    | 0.24 |
| Vitamine D per 1000 kcal (µg)                     | 0.62    | 0.67 |
| α-Tocopherol per 1000 kcal (mg)                   | 0.03    | 0.24 |
| Vitamine K per 1000 kcal (µg)                     | 0.00    | 0.20 |
| Vitamine B1 per 1000 kcal (mg)                    | 0.28    | 0.40 |
| Vitamine B2 per 1000 kcal (mg)                    | 0.10    | 0.24 |
| Niacin per 1000 kcal (mg)                         | 0.29    | 0.41 |
| Vitamine B6 per 1000 kcal (mg)                    | 0.33    | 0.45 |
| Vitamine B12 per 1000 kcal (µg)                   | 0.57    | 0.67 |
| Folic acid per 1000 kcal (µg)                     | 0.35    | 0.45 |
| Pantothenic acid per 1000 kcal (mg)               | 0.01    | 0.24 |
| Vitamine C per 1000 kcal (mg)                     | 0.80    | 0.83 |
| Saturated fatty acids per 1000 kcal (g)           | 0.13    | 0.24 |
| Monounsaturated fatty acids per 1000 kcal (g)     | 0.21    | 0.32 |
| Polyunsaturated fatty acids per 1000 kcal (g)     | 0.04    | 0.24 |
| Cholesterol per 1000 kcal (mg)                    | 0.09    | 0.24 |
| Water soluble dietary fiber per 1000 kcal (g)     | 0.05    | 0.24 |
| Insoluble dietary fiber per 1000 kcal (g)         | 0.16    | 0.27 |
| Total dietary fiber per 1000 kcal (g)             | 0.09    | 0.24 |
| Salt equivalent per 1000 kcal (g)                 | 0.85    | 0.85 |
| Sugar per 1000 kcal (g)                           | 0.43    | 0.54 |
| Alcohol per 1000 kcal (g)                         | 0.57    | 0.67 |
| Daidzein per 1000 kcal (mg)                       | 0.06    | 0.24 |
| Genistein per 1000 kcal (mg)                      | 0.07    | 0.24 |
| ω:3 polyunsaturated fatty acids per 1000 kcal (g) | 0.35    | 0.45 |
| ω:6 polyunsaturated fatty acids per 1000 kcal (g) | 0.04    | 0.24 |

FDR: false discovery rate.
